Articles of interest in other COB journals

From *Journal of Cell Science*

**The primary cilium coordinates early cardiogenesis and hedgehog signaling in cardiomyocyte differentiation**

Christian A. Clement, Stine G. Kristensen, Kjeld Møllgård, Gregory J. Pazour, Bradley K. Yoder, Lars A. Larsen and Søren T. Christensen

Clement, C. A. et al. 2009. *J. Cell Sci.* doi:10.1242/jcs.049676

**In vitro differentiation of retinal cells from human pluripotent stem cells by small-molecule induction**

Fumitaka Osakada, Zi-Bing Jin, Yasuhiko Hirami, Hanako Ikeda, Teruko Danjyo, Kiichi Watanabe, Yoshiki Sasai and Masayo Takahashi

Osakada, F. et al. 2009. *J. Cell Sci.* doi:10.1242/jcs.050393
